# Supplementary material for: Iron Oxide Nanorings and Nanotubes for Magnetic Hyperthermia: The Problem of Intraparticle Interactions
Source: MDPI journal article supplement (doi:10.3390/nano11061380), 2021-05-24
Supplement: s1 [file s1]

## SUPPLEMENTARY INFORMATION

# Iron Oxide Nanorings and Nanotubes for Magnetic Hyperthermia: The Problem of Intraparticle Interactions

Raja Das <sup>1,2,\*</sup>, Javier Alonso Masa <sup>3</sup>, Vijaysankar Kalappattil <sup>4</sup>, Zohreh Nemati <sup>4</sup>, Irati Rodrigo <sup>5</sup>, Eneko Garaio <sup>6</sup>, José Ángel García <sup>7</sup>, Manh-Huong Phan <sup>4</sup> and Hariharan Srikanth <sup>4,\*</sup>

<sup>1</sup> Faculty of Materials Science and Engineering, Phenikaa University, Hanoi 12116, Vietnam

<sup>2</sup> Phenikaa Research and Technology Institute (PRATI), A&A Green Phoenix Group, 167 Hoang Ngan, Hanoi 13313, Vietnam

<sup>3</sup> Departamento CITIMAC, Universidad de Cantabria, 39005 Santander, Spain; alonsomasaj@unican.es

<sup>4</sup> Department of Physics, University of South Florida (USF), Tampa, FL 33620, USA;

[vijaysankar@mail.usf.edu](mailto:vijaysankar@mail.usf.edu) (V.K.); [zohre.nematy@gmail.com](mailto:zohre.nematy@gmail.com) (Z.N.);

[phanm@usf.edu](mailto:phanm@usf.edu) (M.-H.P.)

<sup>5</sup> Departamento de Electricidad y Electrónica, Universidad del País Vasco (UPV/EHU), 48940 Leioa, Spain; irati.rodrido@bcmaterials.net

<sup>6</sup> Depto. de Física Aplicada, Universidad Pública de Navarra (UPN), 31006 Pamplona, Spain; eneko.garayo@unavarra.es

<sup>7</sup> Depto. de Física, Universidad del País Vasco (UPV/EHU), 48940 Leioa, Spain; joseangel.garcia@ehu.eus

\* Correspondence: raja@phenikaa-uni.edu.vn (R.D.); sharihar@usf.edu (H.S.)

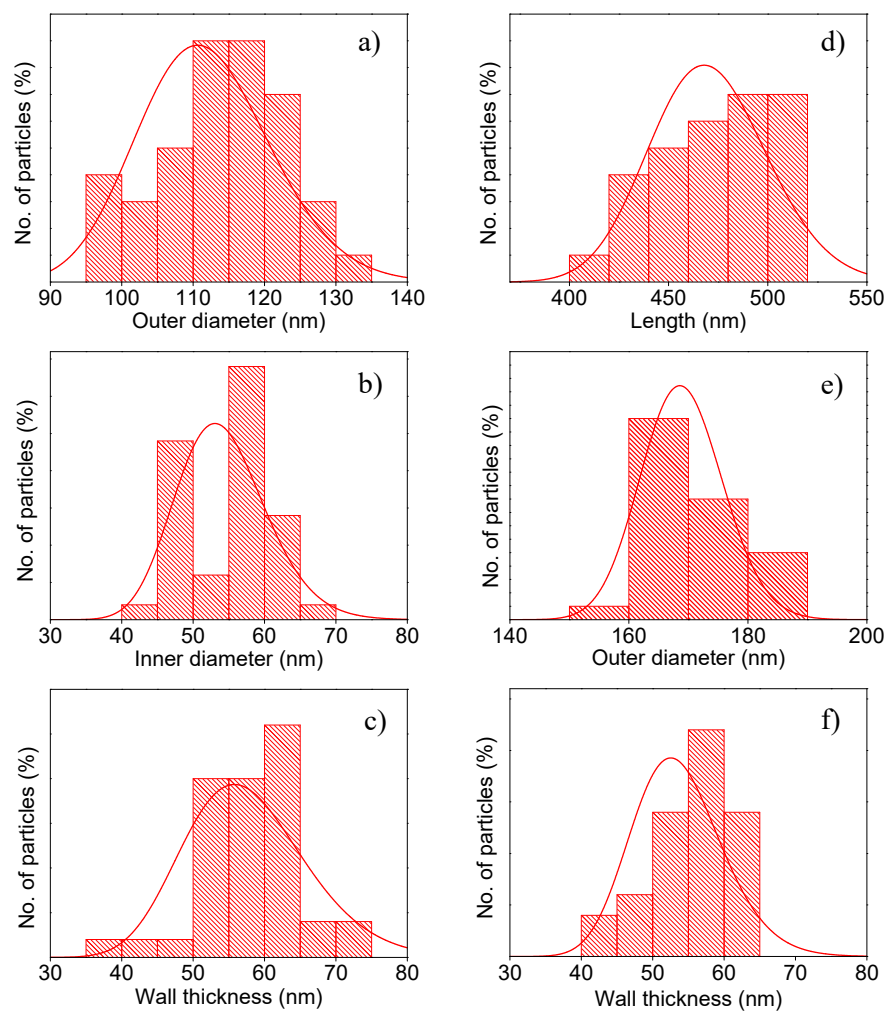

**Figure S1.** The size distribution histograms for (a–c) NRs and (d–f) NTs.

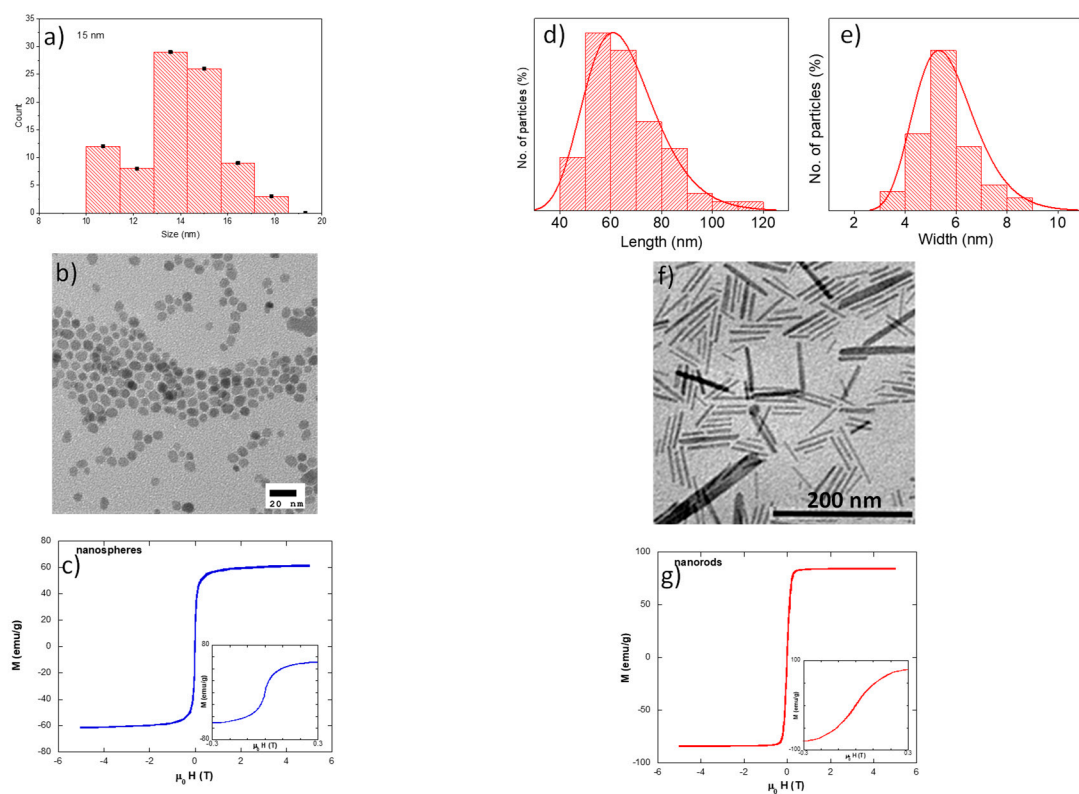

**Figure S2.** TEM images and size distributions of 15 nm nanospheres (a,b) and 65 × 6 nm nanorods (d-f). In addition, the M-H loops measured at 300 K for the nanospheres (c) and the nanorods (g) are also included. The insets are a zoom-in of the low field region of these M-H loops.

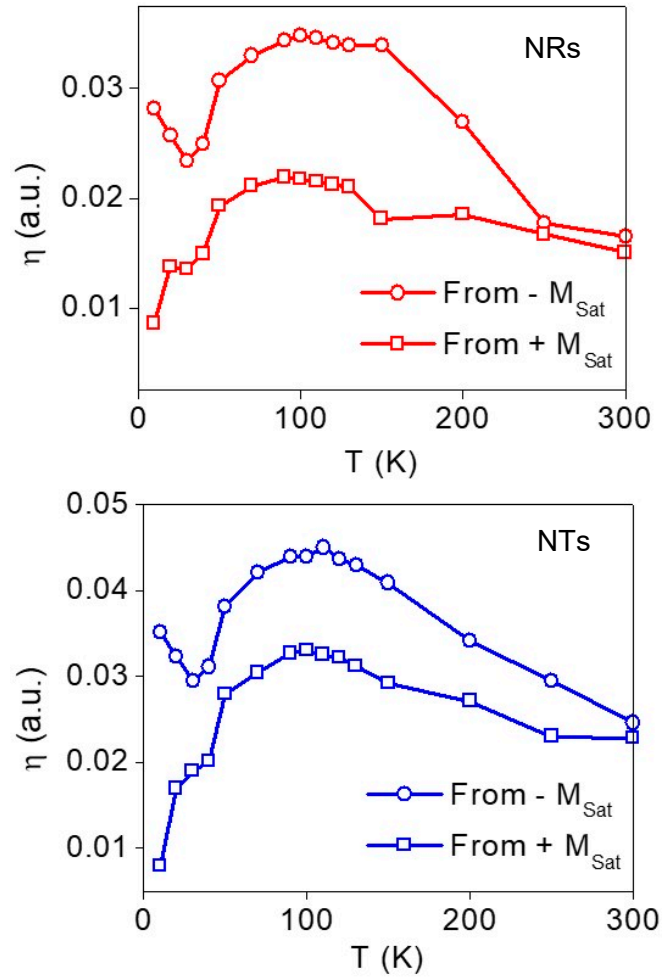

**Figure S3.** Peak height difference ( $\eta$ ) curves calculated from positive and negative saturation magnetization ( $M_{\text{sat}}$ ) for NRs and NTs.

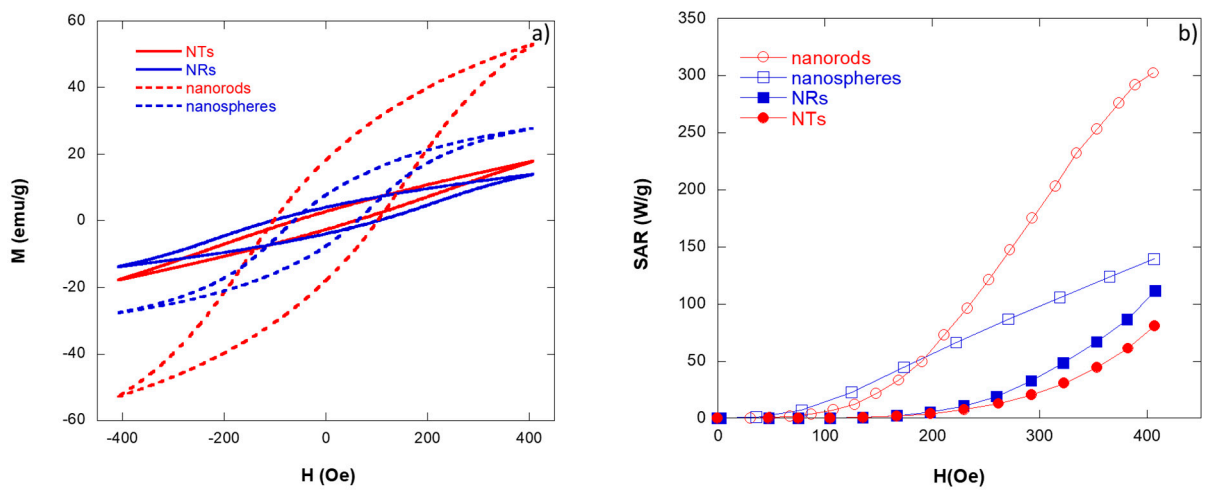

**Figure S4.** (a) AC loops and (b) SAR vs  $H$  curves for NTs, NRs, and 15 nm nanospheres and 65 × 6 nm nanorods, similar to the constituent nanograins.
